# Supplementary material
Source: publisher site journal article supplement (https://www.dovepress.com/article/616733)
Supplement: Supplementary file 1 [file 616733%20Revised%20Supplementary%20Material.docx]

# Supplementary Material

*Making Loop Gain Actionable in Clinical Decision-Making for Obstructive Sleep Apnea: Formal Supplementary Methods, Formula Framework, Quality Control, and Expanded Evidence*

| This supplementary document preserves the methodological depth intentionally condensed in the main manuscript and systematically provides the control-theory framework, representative formulas, parameter definitions, modeling assumptions, signal-quality control, reporting elements, and a matrix of key supporting evidence. All formulas are included to explain the mathematical language shared across methods or to illustrate representative implementations; unless independently replicated, they should not be regarded as universally transferable cross-platform conversion equations. |
| --- |

To verify recent translational milestones, we additionally checked the 2025 American Thoracic Society (ATS) research statement, work on PSG optimization techniques, PPG-derived arousal substitution, RIP-based dynamic modeling, and pharmacologic intervention studies1–6.

**Interpretive note. This document distinguishes at least three meanings of “loop gain”: (1) a frequency-dependent dynamic quantity in control theory; (2) a reference or approximate value estimated under a specific experimental paradigm; and (3) a phenotypic output reconstructed from PSG or alternative signals through a model. Unless the same software, optimization strategy, and broadly similar signal definitions are used, LG values from different studies should not be assumed to be interchangeable**1,3,7,8**.**

Definitions of ventilatory deficit, eupneic ventilation, drive units, and arousal-related drive differ slightly across studies; cross-study comparisons should therefore be anchored to the original algorithm description whenever possible.

## Supplementary Table S1. Symbols and variable definitions

| **Symbol** | **Meaning** | **Typical unit/range** | **Comment** |
| --- | --- | --- | --- |
| LG | Loop gain, i.e., the ratio of feedback response to disturbance | Dimensionless | General term; must be interpreted within a specific methodological context |
| LG0 | Steady-state loop gain | Dimensionless | Commonly used in time-domain state equations |
| LG1 | Dynamic loop gain at 1 cycle/min | Dimensionless; typical PSG/PUP-style reported values are approximately 0.3–1.2, with many adult OSA cohorts clustering around 0.4–0.8 | Frequently reported PSG-based dynamic LG metric. Values around 0.7 have been used in selected PSG-based implementations as a representative high-LG cutoff, but this threshold is algorithm-, signal-, and cohort-dependent and should not be treated as a universal treatment threshold. |
| Gc(f) | Controller gain | L·min^-1·mmHg^-1 or frequency-domain magnitude | Response of the chemoreflex/controller to blood-gas changes |
| Gp(f) | Plant gain | mmHg·min·L^-1 or frequency-domain magnitude | The “plant” component translating ventilation changes into blood-gas changes |
| D or δ | Circulatory delay / time delay | s | Primarily affects phase and oscillation period |
| τ | Time constant | s | Determines the speed of drive recovery |
| V̇E eupnea | Steady-state eupneic ventilation | L/min | May be estimated from stable breathing or implicitly estimated within the model |
| ΔV̇E | Ventilatory deficit relative to eupnea | L/min or % eupnea | Definitions differ slightly across studies |
| Vchem | Chemical-drive component | L/min or % eupnea | Represents delayed post-event chemical recovery drive |
| Varousal | Arousal-related drive component | L/min or % eupnea | Derived from EEG arousal or a validated surrogate |
| VTAF | Ventilatory transfer amplification factor | Dimensionless | Used in the PAV framework to back-calculate intrinsic LG |
| MBHD | Maximum breath-hold duration | s | Core variable in awake simplified screening |
| VSS | Estimated steady-state ventilation within a window | L/min | Reference level used in RIP-based dynamic modeling |

In its most general sense, LG describes how strongly a feedback system amplifies a disturbance and is fundamentally a dynamic quantity rather than a single constant. For the respiratory control system, LG is commonly represented as the product of controller gain, plant gain, and circulatory delay; both magnitude and phase therefore vary with frequency. Sleep-breathing studies often report LG1 because a frequency of approximately 1 cycle/min is close to the oscillatory period commonly observed during sleep and is therefore useful for communication across studies1,7,9–13. The equations shown below are representative formulations that preserve the physiological meaning used in the cited literature. Because published implementations differ in notation, signal definitions, preprocessing, and optimization, these expressions should not be interpreted as software-independent clinical conversion rules.

# Supplementary Methods S1. Control-theory framework and core formulas

In its most general sense, LG describes how strongly a feedback system amplifies a disturbance, and is fundamentally a dynamic quantity rather than a single constant. For the respiratory control system, LG is commonly represented as the product of controller gain, plant gain, and circulatory delay; both magnitude and phase therefore vary with frequency. Sleep-breathing studies often report LG1 because a frequency of approximately 1 cycle/min is close to the oscillatory period commonly observed during sleep and is therefore useful for communication across studies1,7,9–13.

| **General definition**9,10,13 LG = |ΔResponse| / |ΔDisturbance| |
| --- |
| **Frequency-domain expression**10,13,14 LG(jω) = Gc(jω) × Gp(jω) × exp(−jωD) |
| **Dynamic LG and LG1**1,7,9 |LG(f)| = LG0 / sqrt(1 + (2πfτ)^2) LG1 = |LG(f = 1/60 Hz)| |

These expressions have two immediate implications. First, outputs labeled “LG” need not be numerically identical when they arise from different frequency bands, input definitions, or optimization procedures. Second, although LG1 is the value most commonly discussed in the OSA literature, it does not automatically equal “overall LG” or “intrinsic LG” from another study; those quantities must still be interpreted in light of the underlying experimental input and response definitions1,3,7,8.

# Supplementary Methods S2. Research-grade reference approaches

## S2.1. CPAP dial-down / dial-up

After steady-state ventilation has been established at therapeutic pressure, a brief pressure reduction can be used to induce a ventilatory deficit; ventilatory overshoot after return to treatment pressure then yields an LG approximation that is closely aligned with the feedback definition. This method is an important anchor because both the disturbance and the response can be observed directly during sleep and remain close to the physiological definition of LG8,15.

| **Approximate expression for the CPAP reference method**15 LG CPAP ≈ |(V̇E post − V̇E eupnea) / (V̇E eupnea − V̇E dialdown)| |
| --- |

Rigorous implementation requires stable sleep windows, exclusion of clear leak or segments in which stable ventilation cannot be determined, and breath-by-breath averaging or smoothing of respiratory waveforms. Its limitation lies less in principle than in workflow burden: it requires dedicated nocturnal intervention, technical support, and relatively stable sleep, making it more suitable for calibration and research than for routine outpatient deployment15.

## S2.2. Proportional assist ventilation (PAV)

PAV drives the system toward the threshold of instability by applying external assistance. When the assistance level is increased to the point at which stable periodic breathing first appears, the amplified total loop gain can be approximated as 1, allowing back-calculation of the patient’s intrinsic control instability. The major strength of PAV is that it emphasizes the patient’s underlying ventilatory control stability rather than fitting one night’s sequence of events retrospectively16–19.

| **Back-calculation of intrinsic LG from PAV**16–19 LG intrinsic × VTAF threshold ≈ 1 LG intrinsic ≈ 1 / VTAF threshold |
| --- |

Because the method depends heavily on accurate estimates of resistance, elastance, and the strategy for incrementing assistance, results should be compared cautiously across laboratories. Its outputs are most useful for understanding intrinsic control stability rather than for direct reporting in routine sleep-laboratory practice17–19.

## S2.3. PRBS-CO2 system identification

PRBS-CO2 uses pseudorandom switching of inspired CO2 concentration to perform system identification of ventilatory control while the subject is awake. Its chief value is the ability to decompose total LG into controller gain and plant gain, thereby addressing whether elevated LG is driven mainly by heightened chemosensitivity or by altered plant/reservoir dynamics14,20,21.

| **Frequency-domain framework for PRBS-CO2**14,20,21 Gc(f) = |ΔV̇E(f) / ΔPETCO2(f)| Gp(f) = |ΔPETCO2(f) / ΔV̇E*(f)| LG(f) = Gc(f) × Gp(f) |
| --- |

Because the method is performed during wakefulness and requires gas-delivery hardware, PETCO2 monitoring, and signal-synchronization infrastructure, it is best suited to research and device validation. An automated platform reported in 2025 suggests that PRBS-CO2 may evolve from a labor-intensive research method toward a faster and more automated experimental platform, but its outputs still should not be treated as equivalent to nocturnal PSG-derived LG values20,21.

## S2.4. Duty-ratio (DR) method

For regular, approximately sinusoidal periodic breathing, LG can be estimated from the proportion of the cycle occupied by the ventilatory phase. Direct duty-ratio-based loop-gain calculation and control-theory prediction have been described primarily in Cheyne-Stokes respiration, heart-failure-related central sleep apnea, or high-altitude periodic breathing, but this approach is not an appropriate main pathway for most patients whose OSA is dominated by irregular obstructive events22–26.

| **Duty-ratio method under regular waveform conditions**23,25,26 DR = T vent / T cycle LG = 2π / [2πDR − sin(2πDR)] |
| --- |

# Supplementary Methods S3. Endotyping from raw PSG: state equations, identification steps, and quality control

PSG-based modeling is the pathway closest to clinical translation because it does not require a new measurement platform; instead, it reconstructs ventilatory-drive dynamics from signals already acquired in routine sleep laboratories, including nasal pressure, effort belts, sleep stage, and respiratory events. The key issue is not whether a model exists, but whether input definitions, window selection, optimization procedures, boundary constraints, and rules for failed windows are documented transparently1,3,8,27,28.

| **Representative state equations for PSG modeling**8,27,28 V drive(t) = V chem(t) + V arousal(t) τ·dV chem(t)/dt = −V chem(t) + LG0·ΔV̇E(t − δ) ΔV̇E(t) = V̇E eupnea − V̇E(t) LG1 = LG0 / sqrt(1 + (2πτ/60)^2) |
| --- |

Within this framework, ventilatory deficit is usually defined as the reduction in ventilation relative to an estimate of steady-state eupnea. Thus, when an event lowers V̇E, the delayed chemical-recovery term increases. The delay δ primarily shapes phase and oscillatory period; the time constant τ determines the speed of recovery; LG0 reflects steady-state feedback gain; and LG1 more closely captures dynamic instability in the frequency range typical of sleep-related oscillations. Implementations differ in how arousal-related drive is handled: some construct an additional drive term directly from EEG arousal markers, whereas others estimate it jointly with upper-airway collapsibility, muscle compensation, and arousal threshold within a broader endotyping framework4,8,27,28.

## S3.1. Input signals and preprocessing

Interpretable PSG endotyping generally requires at least a high-quality nasal-pressure signal or another reliable surrogate of ventilation, together with effort belts, sleep staging, body position, and scored respiratory events. Leak, sensor loss, signal clipping, sustained wakefulness, and unstable sleep directly reduce model identifiability. Most implementations fit the model in fixed-length windows—commonly about 7–8 min, often with overlap. If a window contains insufficient obstruction–recovery information, parameter estimates may fall on the boundary or fail to converge3,27,28.

## S3.2. Parameter estimation and optimization

| **Typical optimization objective**3,28 θ* = argmin θ Σ t [V̇E observed(t) − V̇E model(t; θ)]^2 θ = {LG0, τ, δ, and other implementation-specific parameters} |
| --- |

Optimization is not a neutral engineering detail. An AnnalsATS study published in 2025 showed directly that, even within the same PUP framework, different optimization strategies alter the residual distribution, the number of boundary solutions, and the final high-versus-low LG classification. Software version, parameter bounds, initialization strategy, and rules for handling failed windows should therefore be regarded as part of the result definition itself3.

## S3.3. Output interpretation and minimum quality control

Changes in AHI before and after oxygen therapy can indicate the extent to which ventilatory instability contributes to a patient’s disease, but they cannot directly replace LG measurement because treatment response is simultaneously influenced by anatomical collapsibility, muscle compensation, arousal threshold, and sleep stage29–31. Likewise, improvement with carbonic anhydrase inhibition is better interpreted as a pharmacologic probe of high-LG mechanisms than as a direct substitute for LG quantification. Acetazolamide has been shown to reduce loop gain in OSA6, and subsequent sulthiame/sultiame trials pushed this mechanism further toward therapeutic development5,32.

# Supplementary Methods S4. Spontaneous-breathing and multivariable dynamic modeling

Beyond classic PUP-style time-domain state equations, ventilatory control stability can also be estimated from multivariable time series during spontaneous breathing. When V̇E, PETCO2, and PETO2 are recorded synchronously, the model can further partition the contribution of CO2 and O2 pathways to total LG, allowing finer mechanistic dissection33,34.

| **Illustration of multivariable dynamic modeling**33,34 x(n) = Σ(k=1→p) A k x(n−k) + w(n) x(n) = [V̇E(n), PETCO2(n), PETO2(n)]^T LG total(f) = LG CO2(f) + LG O2(f) |
| --- |

The limitation of this pathway is that it imposes higher demands on signal synchronization, sampling completeness, and model stability, making it better suited to advanced translational or mechanistic research. Its strength lies in decomposing “high LG” into more interpretable dynamic sources.

# Supplementary Methods S5. Simplified screening tools and alternative indicators

## S5.1. Daytime voluntary breath-holding

Daytime breath-holding attempts to identify a nocturnal high-LG tendency from the recovery-drive response measured while the patient is awake. Its appeal lies in convenience and low cost, but it is fundamentally a screening tool rather than an equivalent measure of sleep LG. A comparative study published in 2024 further showed that awake control metrics are correlated with, but not identical to, nocturnal endotypes; the method is therefore better used as front-end screening than as a substitute for nocturnal endotype reconstruction35.A later comparative study of awake respiratory-control measures and sleep OSA endotypes supports this caution, although it did not externally validate this specific breath-holding equation36.

| **Representative empirical equation for daytime breath-holding**35,36 MBHD = max i(t BH,i) LG sleep,pred = 0.43 − 0.0055×MBHD(s) + 0.0015×Second-breath response(%eupnea) |
| --- |

Validation context:

**Population:** adults studied in a single-night physiological protocol; 10 patients with OSA and 10 control participants.
**Sample size:** 20 analyzable participants.
**Reference standard:** sleep LG measured during non-REM sleep using 20-s hypoxic-hypercapnic gas pulses while CPAP maintained airway patency.
**Validation status:** derivation study with leave-one-out cross-validation for classification performance; no independent external validation identified.
**Clinical boundary:** screening for a high-LG tendency; not a substitute for nocturnal PSG-based endotyping or a platform-independent clinical equation.

## S5.2. Point-of-care prediction models

Point-of-care models derived from routine PSG report variables offer a practical route to rapidly identifying a high-LG tendency without raw-signal processing. Their major advantage is low implementation burden, but the output is a predicted value rather than a physiologically reconstructed measure and is therefore best used for risk stratification, referral, or deciding whether more detailed endotyping is warranted37.

| **Point-of-care prediction equation**37 Hypopnea% = Hypopneas / (Apneas + Hypopneas) × 100% LG pred = 0.72290 + 0.00159×AHI − 0.00186×Hypopnea% |
| --- |

Validation context:

**Population:** consecutive adults with OSA diagnosed by in-laboratory PSG; AHI >5 events/h.

**Sample size:** 1055 participants; training set n = 791 and test set n = 264.

**Reference standard:** LG estimated from raw PSG signals using a customized algorithm; high LG defined as >0.7 within that implementation.

**Validation status:** 3:1 split-sample internal validation; no independent external validation identified.

Model performance: moderate correlation with reference LG and moderate discrimination for high-versus-low LG classification.

**Clinical boundary:** rapid screening or referral for detailed endotyping; not definitive physiological quantification or a universal cross-platform LG equation.

## S5.3. Oxygen and pharmacologic response as therapeutic probes

Changes in AHI after oxygen therapy or carbonic anhydrase inhibition can provide indirect evidence that ventilatory control instability contributes to OSA maintenance. However, treatment response should not be treated as a direct substitute for LG measurement, because AHI change also depends on anatomical collapsibility, upper-airway muscle compensation, arousal threshold, sleep stage, body position, and baseline event composition5,32.

| **Simple representation of intervention response**5,6,29–32 AHI reduction rate = (AHI baseline − AHI after intervention) / (AHI baseline) × 100% |
| --- |

Evidence context:

**Oxygen therapy:** randomized crossover and post-surgical residual-OSA studies suggest that oxygen can reduce OSA severity in selected patients, but response is heterogeneous and not explained by LG alone.

Acetazolamide: physiological intervention study in OSA showing a reduction in LG, with little effect on the other major physiological traits.

**Sulthiame/sultiame:** randomized clinical trials support carbonic anhydrase inhibition as a pharmacologic strategy for reducing OSA severity, but these studies should be interpreted as therapeutic development evidence rather than direct validation of LG-based clinical reporting.

**Clinical boundary:** intervention response can be used as a therapeutic probe or treatment-stratification signal, not as a replacement for nocturnal LG quantification.

# Supplementary Methods S6. Automation and alternative-sensor pathways

## S6.1. Self-similarity algorithms

Self-similarity algorithms identify a manifest high-LG surrogate from repeated oscillatory patterns in effort-based respiratory signals. The emphasis is on how much of the night is occupied by a characteristic cyclical waveform pattern rather than on estimating an absolute LG value that can be compared across platforms. Accordingly, the output is best understood as a pattern-recognition marker of expressed ventilatory instability38.

| **Self-similarity surrogate**38 Full-night similarity = t(ρ max > 0.8) / TST × 100% |
| --- |

Validation context:

**Population:** patients with paired diagnostic PSG and CPAP titration PSG recordings from a large clinical sleep database.

**Sample size:** 2466 diagnostic–CPAP PSG pairs.

**Reference outcome:** residual central respiratory events during CPAP, defined by central apnea index >10 events/h.

**Signal source:** effort-based respiratory signals from diagnostic non-CPAP PSG.

**Validation status:** retrospective algorithm development and internal validation within the source database; no independent external validation identified in the literature reviewed.

**Clinical boundary:** automated surrogate for expressed high-LG or periodic-breathing tendency; not an absolute LG measurement or a cross-platform replacement for PSG-based endotyping.

## S6.2. PPG-derived autonomic arousal

In EEG-free polygraphy, event-related autonomic arousal can be inferred from PPG-derived pulse rate, pulse-wave amplitude, pulse propagation time, and SpO2 dynamics. This surrogate arousal signal can then be entered into an existing endotyping framework to estimate OSA pathophysiological traits without manually scored EEG arousals4.

| **Representative model for PPG-predicted arousal**4 logit{P(arousal ij = 1)} = β0 + b i + β1·PR ij + β2·PWA ij + β3·PPT ij + β4·ΔSpO2 ij + β5·EventType ij |
| --- |

Validation context:

**Population:** patients referred for suspected OSA who underwent single-night ambulatory PSG.

**Sample size:** 87 analyzable participants; training set n = 70 and test set n = 17.

**Signal source:** PPG-derived pulse rate, pulse-wave amplitude, pulse propagation time, SpO2 change, and respiratory event type.

**Reference standard:** manually scored EEG-based arousals and EEG-based PUP endotyping.

**Validation status:** internal training/test-set validation within the same source cohort; no independent external validation identified.

**Model performance:** moderate arousal-prediction performance in the test set, but strong agreement for several derived endotypic traits, including LG1.

**Clinical boundary:** low-burden arousal substitution pathway for extending PUP-style endotyping to polygraphy or HSAT-like settings; not a standalone LG measurement and not yet an externally validated clinical reporting standard.

## S6.3. RIP-based dynamic modeling

Recent RIP-based dynamic modeling further reduces dependence on full PSG airflow signals. This approach uses windowed respiratory inductance plethysmography signals to estimate ventilatory-control dynamics and derive LG-like outputs through automated time-domain modeling. Its main advantage is scalability, but the resulting values remain method-specific and should not yet be treated as gold-standard LG measurements.2.

| **Windowed LG in RIP-based dynamic modeling**2 LG window = ΔV R / ΔV D = |V post − V SS| / |V during − V SS| |
| --- |

Validation context:

**Population:** multi-source sleep apnea datasets, including clinical PSG recordings, heart-failure patients, and high-altitude recordings.

**Sample size:** 465 patients analyzed; 400 from the Massachusetts General Hospital dataset and 65 heart-failure patients.

**Signal source:** RIP signals filtered, normalized, and segmented into 8-min windows.

**Modeling approach:** augmented Mackey–Glass equation with expectation–maximization parameter estimation; simulation experiments used synthetic breathing data with known parameters.

**Validation status:** retrospective multi-source algorithm study with simulation-based parameter testing; no direct comparison with gold-standard LG methods such as CPAP dial-down identified.

**Clinical boundary:** emerging automated pathway for scalable LG estimation from RIP; values should be interpreted as method-specific estimates or guidelines rather than absolute LG measurements or validated clinical reporting standards.

# Supplementary Methods S7. Reporting standards, interpretive boundaries, and a minimum quality-control set

The ATS 2025 research statement emphasizes that the central challenge in translating OSA endotyping is not simply to develop more algorithms, but to improve comparability, verifiability, and implementability1. For LG, at minimum, reports should specify the method name and software version, input signals and preprocessing strategy, parameter bounds and optimization algorithm, analysis windows and inclusion criteria, proportion of analyzable windows, proportion of boundary solutions, major signal-quality problems, the continuous LG or LG1 value, the sleep stage and body position to which it applies, and the principal interpretive limitations1,3,8,27,28.

Research-derived cutoffs, such as values around 0.7 used in selected PSG-based implementations, should only be used as thresholds for a “high-LG tendency” when the data source, signal definitions, model structure, optimization strategy, and algorithmic implementation are comparable. Across platforms, algorithms, or signal carriers, the safest practice remains to report continuous values first and to treat categorical stratification as an implementation-specific interpretation rather than a generalized clinical cutoff1,3,8,37,39.

| **Method** | **Input signal/intervention** | **Core output** | **Strongest advantage** | **Key limitation** | **Current most defensible role** |
| --- | --- | --- | --- | --- | --- |
| CPAP dial-down | Therapeutic pressure + brief pressure reduction + ventilation signal | Approximate overall LG | Most directly linked to the physiological definition | Requires dedicated intervention and is costly clinically | Reference method / algorithm calibration |
| PAV | Proportional assistance with resistance/elastance estimation | Approximate intrinsic LG | Highlights intrinsic control stability | High equipment and technical burden | Research method |
| PRBS-CO2 | Gas-delivery system + PETCO2 + ventilation | Gc, Gp, and LG(f) | Can separate controller and plant contributions | Performed awake and technically complex | Research method |
| Duty-ratio method | Regular periodic-breathing waveform | LG for regular waveforms | Simple implementation | Not suitable for most OSA | Tool for specific scenarios |
| PSG modeling | Nasal pressure, effort belts, arousal/staging | LG1 and related endotypes | Closest to routine sleep-laboratory workflow | Depends on software version, windows, and quality control | Main translational pathway |
| Multivariable dynamic modeling | V̇E + PETCO2 + PETO2 | Channel-decomposed LG | Finest mechanistic decomposition | High signal requirements | Advanced translational/research use |
| Daytime breath-holding | Awake breath-holding and recovery breathing | High-LG tendency | Convenient and inexpensive | Limited external validation | Front-end screening tool |
| Point-of-care prediction | Routine PSG summary variables | Predicted LG | No raw-signal processing required | Not a physiologically reconstructed value | Rapid stratification/referral |
| Self-similarity | RIP or effort-belt waveform | Manifest high-LG surrogate | Automation-friendly | Not an absolute LG value | Pattern-recognition marker |
| PPG-derived arousal substitution | PPG + SpO2 ± event type | Arousal surrogate usable within PUP | Extends endotyping to polygraphy | Requires external validation | Low-burden endotyping |
| RIP-based dynamic modeling | Windowed RIP signal | Windowed LG | Strong potential for automation and scale | Still at an early deployment stage | Emerging translational pathway |

Note: The “current role” column reflects the most defensible use under the present evidence base and does not exclude future expansion after standardization, external validation, and further automation.

## Supplementary Table S2. Key studies arranged along the clinical-translation pathway

| **Study** | **Design/population** | **Sample size** | **LG-related method** | **Clinical-translational message** | **Role** |
| --- | --- | --- | --- | --- | --- |
| Terrill 20158 | Methodological validation; patients with OSA | CPAP control 28; oxygen 11; acetazolamide 11 | PSG-estimated LG | Demonstrated that PSG can estimate LG and detect intervention-induced change | Starting point for translation |
| Wellman 201315 | Simplified phenotyping study | 13 participants; repeatability assessed in 5 | CPAP dial-down | Established the reference framework for sleep-period phenotyping | Reference method |
| Gederi 201434 | Validation study | 21 participants: 8 controls and 13 OSA | Spontaneous-breathing modeling | Showed that spontaneous-breathing modeling can track PAV-induced increases in LG and controller gain | Research-grade evidence |
| Sands 201827 | Methodological/validation study | 29 participants; nasal-pressure validation subset n = 11 | PSG-derived ventilatory-drive reconstruction | Supported the physiological credibility of PSG endotyping | From mechanism to algorithm |
| Finnsson 202128 | Engineering reimplementation | 38 manually scored PSG studies | Scalable PUP implementation | Advanced cross-center reproducibility and platformization | Pre-deployment stage |
| Joosten 201739 | Retrospective surgical study | 46 participants | PSG-estimated LG | Lower LG was associated with better surgical response | Treatment stratification |
| Sands 201829 | Randomized crossover trial | 36 participants | PSG endotyping plus oxygen therapy | Suggested that oxygen responsiveness may be predicted by a combination of endotypic traits, although LG alone was not sufficient as a single predictor | Treatment matching |
| Phyu 202430 | Systematic review and meta-analysis of nocturnal oxygen therapy in OSA | 9 randomized studies; 502 participants | Oxygen therapy as LG-lowering intervention context | Showed that nocturnal oxygen therapy can reduce AHI in the short term, while longer-term and standardized studies remain needed | Broader therapeutic evidence |
| Joosten 202131 | Randomized double-blind crossover trial in residual OSA after upper airway surgery | 20 participants; 7 responders by >=50% flow-based AHI reduction | Oxygen therapy plus PSG-derived endotypes | Demonstrated acute improvement with oxygen in some post-surgical residual OSA patients, but baseline endotypes did not clearly distinguish responders | Rescue-treatment evidence; prediction remains uncertain |
| Edwards 20126 | Physiological intervention study in OSA | 13 participants | Acetazolamide effect on LG and other OSA traits | Showed that acetazolamide reduced LG substantially with little effect on other major OSA traits | Pharmacologic probe of LG mechanisms |
| Messineo 201836 | Physiological derivation study comparing awake breath-holding with sleep LG measurement | 20 analyzable participants: 10 OSA and 10 controls | Awake maximum breath-hold duration and second-breath recovery response; reference sleep LG measured during NREM sleep using hypoxic-hypercapnic gas pulses | Suggested that simple wakefulness breath-holding metrics can identify a high-LG tendency | Pilot screening evidence; no independent external validation identified |
| Wang 202435 | Comparative study of awake respiratory-control measures versus sleep OSA endotypes | 21 men with OSA | Awake ventilatory-control testing compared with sleep endotypes | Supported the concept that awake respiratory-control metrics are related to, but not interchangeable with, sleep OSA endotypes | Supports caution for awake screening tools; not external validation of the breath-holding equation |
| Schmickl 202237 | Development/validation study | 1055 adults with OSA; training set n = 791 and test set n = 264 | Point-of-care prediction | Enabled rapid identification of a high-LG tendency using routine report-level variables | Internally validated rapid stratification tool; no independent external validation identified |
| Oppersma 202138 | Algorithm study | 2466 diagnostic-CPAP PSG pairs | Self-similarity surrogate | Used a cyclical self-similarity feature to predict residual central respiratory events during CPAP | Automated surrogate for expressed high-LG / periodic-breathing tendency |
| Tolbert 202340 | Repeatability study | 43 participants; 86 PSGs | PUP endotyping | Provided night-to-night agreement data and highlighted protocol constraints | Reliability evidence |
| ATS 20251 | Official research statement | Multidisciplinary expert consensus | Translational roadmap | Emphasized standardization, external validation, and knowledge translation | Field roadmap |
| Heuker of Hoek 20253 | Technical study | 18 patients with OSA: 6 mild, 6 moderate, and 6 severe | Comparison of optimization techniques | Showed that optimization strategy can affect model error, boundary solutions, and high-versus-low LG classification | Methodological caution |
| Strassberger 20254 | Prospective algorithm study | 87 analyzable participants; training set n = 70 and test set n = 17 | PPG-derived arousal substitution | Supported replacement of EEG arousal input with PPG-derived autonomic arousal features for lower-burden endotyping | Accessibility expansion; requires external validation |
| Nassi 2025/20262 | Automated dynamic modeling | 465 patients analyzed; 400 from the MGH dataset and 65 heart-failure patients | RIP-based dynamic modeling | Promoted lower-burden and more scalable LG estimation | Emerging deployment route |
| Hedner 202232 | Randomized trial | 68 randomized participants: sulthiame 400 mg n = 34, sulthiame 200 mg n = 12, placebo n = 22 | Sulthiame intervention | Suggested that pharmacologic modulation of ventilatory control can improve OSA | Drug translation |
| FLOW 20255 | Multicenter phase 2 trial | 298 randomized participants; 240 completed 15 weeks of treatment | Sultiame once daily | Advanced ventilatory-control-targeted therapy to a more mature stage of clinical development | Drug development |

# Supplementary References

1. Tolbert TM, Schmickl CN, Gell LK, et al. Research Priorities for Translating Endophenotyping of Adult Obstructive Sleep Apnea to the Clinic: An Official American Thoracic Society Research Statement. *Am J Respir Crit Care Med*. 2025;211(9):1562-1583.

2. Nassi T, Amidi Y, Oppersma E, et al. Unraveling sleep apnea dynamics: quantifying loop gain using dynamical modeling of ventilatory control. *Sleep*. 2026;49(2):zsaf213.

3. Heuker Of Hoek TA, Cerina L, de Jongh FHC, Fonseca P, Overeem S, Fabius TM. Loop Gain Quantification from Polysomnography in Obstructive Sleep Apnea Is Impacted by the Model Optimization Technique. *Ann Am Thorac Soc*. 2025;22(8):1273-1276.

4. Strassberger C, Hedner J, Sands SA, Zou D, Grote L. From Pulse to Phenotype: Sleep Apnea Endotyping for Polygraphy via Oximeter-Derived Autonomic Arousal. *Chest*. Published online December 18, 2025:S0012-3692(25)05925-2.

5. Randerath W, Grote L, Stenlöf K, et al. Sultiame once per day in obstructive sleep apnoea (FLOW): a multicentre, randomised, double-blind, placebo-controlled, dose-finding, phase 2 trial. *Lancet*. 2025;406(10514):1983-1992.

6. Edwards BA, Sands SA, Eckert DJ, et al. Acetazolamide improves loop gain but not the other physiological traits causing obstructive sleep apnoea. *J Physiol*. 2012;590(5):1199-1211.

7. Antonaglia C, Citton GM, Soave S, et al. Deciphering loop gain complexity: a primer for understanding a pathophysiological trait of obstructive sleep apnea patients. *Respir Med*. 2024;234:107820.

8. Terrill PI, Edwards BA, Nemati S, et al. Quantifying the ventilatory control contribution to sleep apnoea using polysomnography. *Eur Respir J*. 2015;45(2):408-418.

9. Naughton MT. Loop gain in apnea: gaining control or controlling the gain? *Am J Respir Crit Care Med*. 2010;181(2):103-105.

10. Khoo MC, Kronauer RE, Strohl KP, Slutsky AS. Factors inducing periodic breathing in humans: a general model. *J Appl Physiol*. 1982;53(3):644-659.

11. Önal E, Lopata M. Periodic Breathing and the Pathogenesis of Occlusive Sleep Apneas.

12. Phillipson EA. Control of Breathing during Sleep.

13. Dempsey JA, Smith CA. Pathophysiology of human ventilatory control. *Eur Respir J*. 2014;44(2):495-512.

14. Ghazanshahi SD, Khoo MC. Estimation of chemoreflex loop gain using pseudorandom binary CO2 stimulation. *IEEE Trans Biomed Eng*. 1997;44(5):357-366.

15. Wellman A, Edwards BA, Sands SA, et al. A simplified method for determining phenotypic traits in patients with obstructive sleep apnea. *J Appl Physiol*. 2013;114(7):911-922.

16. Meza S, Younes M. Ventilatory Stability During Sleep Studied With Proportional Assist Ventilation (PAV). *Sleep*. 1996;19(suppl_10):164-166.

17. Younes M, Ostrowski M, Thompson W, Leslie C, Shewchuk W. Chemical Control Stability in Patients with Obstructive Sleep Apnea. *Am J Respir Crit Care Med*. 2001;163(5):1181-1190.

18. Younes M. Proportional assist ventilation, a new approach to ventilatory support. Theory. *Am Rev Respir Dis*. 1992;145(1):114-120.

19. Wellman A, Malhotra A, Fogel RB, Edwards JK, Schory K, White DP. Respiratory system loop gain in normal men and women measured with proportional-assist ventilation. *J Appl Physiol*. 2003;94(1):205-212.

20. Deacon-Diaz NL, Sands SA, McEvoy RD, Catcheside PG. Daytime loop gain is elevated in obstructive sleep apnea but not reduced by CPAP treatment. *J Appl Physiol*. 2018;125(5):1490-1497.

21. Qian Y, Tong H, Cao P, et al. Automatic Measurement of Loop Gain Based on Pseudorandom Binary Sequence CO2 Stimulation. *IEEE Trans Biomed Eng*. 2025;72(1):256-263.

22. Patrician A, Anholm JD, Ainslie PN. A narrative review of periodic breathing during sleep at high altitude: From acclimatizing lowlanders to adapted highlanders. *J Physiol*. 2024;602(21):5435-5448.

23. Sands SA, Edwards BA, Kee K, et al. Loop gain as a means to predict a positive airway pressure suppression of Cheyne-Stokes respiration in patients with heart failure. *Am J Respir Crit Care Med*. 2011;184(9):1067-1075.

24. Randerath W, Baillieul S, Tamisier R. Central sleep apnoea: not just one phenotype. *Eur Respir Rev*. 2024;33(171):230141.

25. Stanchina M, Robinson K, Corrao W, Donat W, Sands S, Malhotra A. Clinical Use of Loop Gain Measures to Determine Continuous Positive Airway Pressure Efficacy in Patients with Complex Sleep Apnea. A Pilot Study. *Ann Am Thorac Soc*. 2015;12(9):1351-1357.

26. Sands SA, Edwards BA, Kee K, et al. Control theory prediction of resolved Cheyne−Stokes respiration in heart failure. *Eur Respir J*. 2016;48(5):1351-1359.

27. Sands SA, Edwards BA, Terrill PI, et al. Phenotyping Pharyngeal Pathophysiology using Polysomnography in Patients with Obstructive Sleep Apnea. *Am J Respir Crit Care Med*. 2018;197(9):1187-1197.

28. Finnsson E, Ólafsdóttir GH, Loftsdóttir DL, et al. A scalable method of determining physiological endotypes of sleep apnea from a polysomnographic sleep study. *Sleep*. 2021;44(1):zsaa168.

29. Sands SA, Edwards BA, Terrill PI, et al. Identifying obstructive sleep apnoea patients responsive to supplemental oxygen therapy. *Eur Respir J*. 2018;52(3):1800674.

30. Phyu SL, Ercan S, Harriss E, Turnbull C. Nocturnal oxygen therapy in obstructive sleep apnoea: a systematic review and meta-analysis. *Eur Respir Rev*. 2024;33(171):230173.

31. Joosten SA, Tan M, Wong AM, et al. A randomized controlled trial of oxygen therapy for patients who do not respond to upper airway surgery for obstructive sleep apnea. *J Clin Sleep Med*. 2021;17(3):445-452.

32. Hedner J, Stenlöf K, Zou D, et al. A Randomized Controlled Clinical Trial Exploring Safety and Tolerability of Sulthiame in Sleep Apnea. *Am J Respir Crit Care Med*. 2022;205(12):1461-1469.

33. Nemati S, Edwards BA, Sands SA, et al. Model-based characterization of ventilatory stability using spontaneous breathing. *J Appl Physiol*. 2011;111(1):55-67.

34. Gederi E, Nemati S, Edwards BA, Clifford GD, Malhotra A, Wellman A. Model-based estimation of loop gain using spontaneous breathing: A validation study. *Respir Physiol Neurobiol*. 2014;201:84-92.

35. Wang D, Martins RT, Rowsell L, et al. Comparison of awake respiratory control versus sleep obstructive sleep apnea endotypes. *J Appl Physiol*. 2024;137(6):1524-1534.

36. Messineo L, Taranto-Montemurro L, Azarbarzin A, et al. Breath-holding as a means to estimate the loop gain contribution to obstructive sleep apnoea. *J Physiol*. 2018;596(17):4043-4056.

37. Schmickl CN, Orr JE, Kim P, et al. Point-of-care prediction model of loop gain in patients with obstructive sleep apnea: development and validation. *BMC Pulm Med*. 2022;22(1):158.

38. Oppersma E, Ganglberger W, Sun H, Thomas RJ, Westover MB. Algorithm for automatic detection of self-similarity and prediction of residual central respiratory events during continuous positive airway pressure. *Sleep*. 2020;44(4):zsaa215.

39. Joosten SA, Leong P, Landry SA, et al. Loop Gain Predicts the Response to Upper Airway Surgery in Patients With Obstructive Sleep Apnea. *Sleep*. 2017;40(7).

40. Tolbert TM, Schoenholz RL, Parekh A, et al. Night-to-night reliability and agreement of obstructive sleep apnea pathophysiologic mechanisms estimated with phenotyping using polysomnography in cognitively normal elderly participants. *Sleep*. 2023;46(8):zsad058.
